# Supplementary material for: Whole exome sequencing in three families segregating a pediatric case of sarcoidosis
Source: Springer Nature journal article supplement (doi:10.1186/s12920-018-0338-x), 2018-03-06
Supplement: MOESM4 [file 12920_2018_338_MOESM4_ESM.pdf]

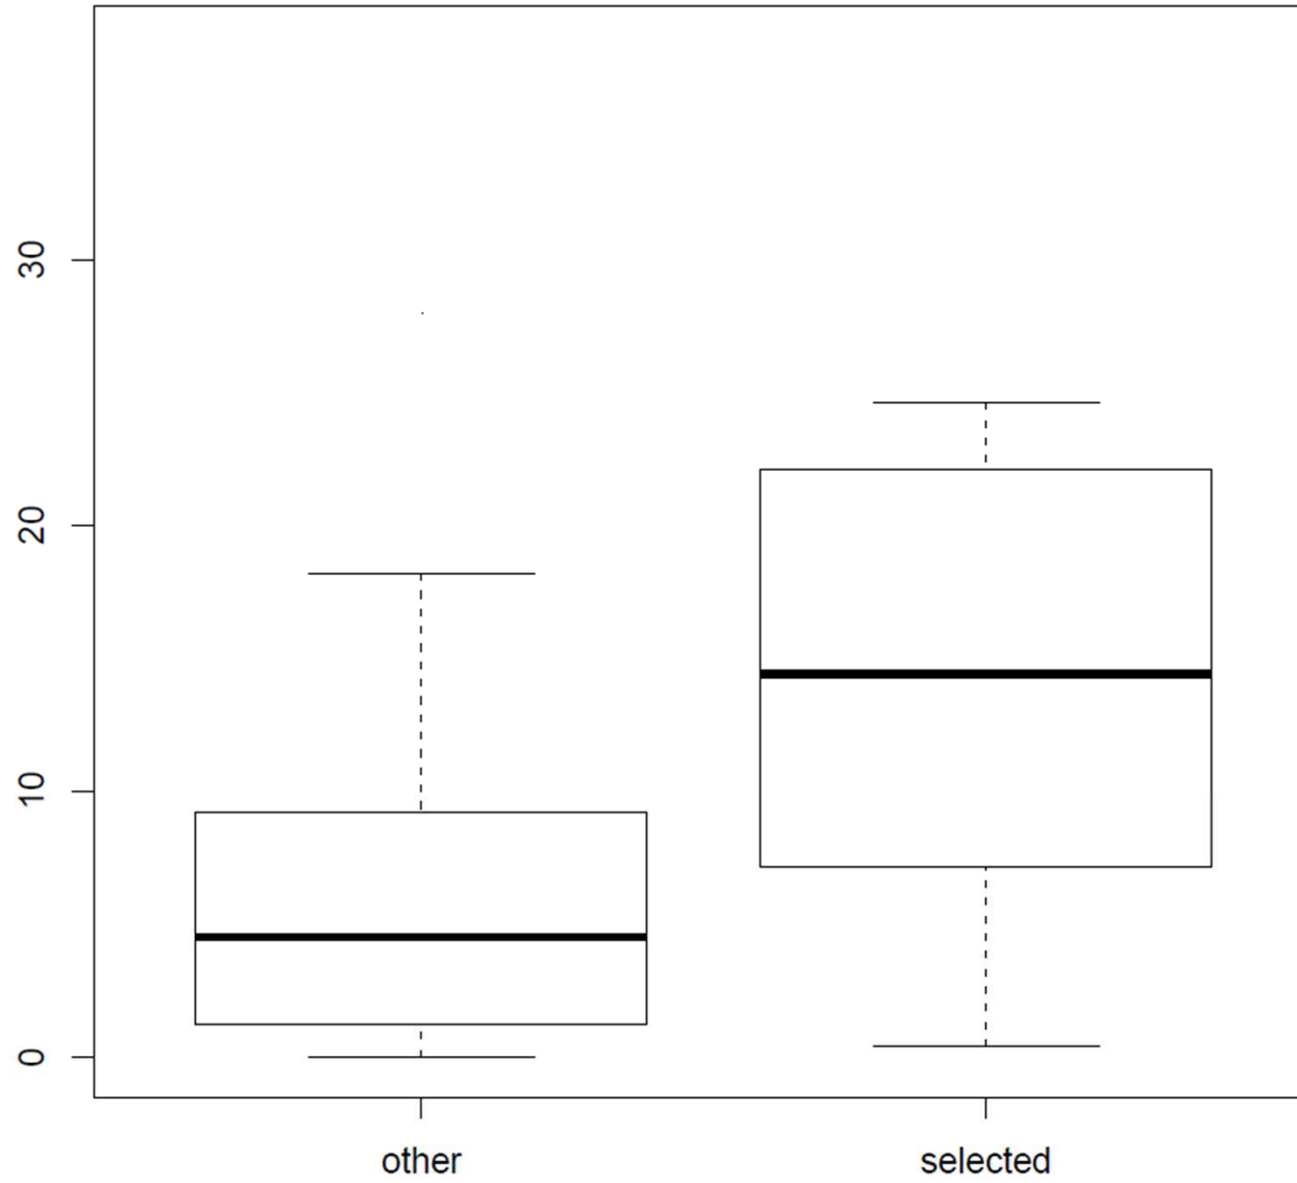

**ADDITIONAL FILE 1 – Figure S1 - CADD scoring of prioritized variants versus other variants in the selected genes**
